# Supplementary material for: New ligand bearing preorganized binding side-arms interacting with ammonium cations: Synthesis, conformational studies and crystal structureElectronic supplementary information (ESI) available: molecular modeling studies. See http://www.rsc.org/suppdata/nj/b3/b306778e/
Source: Royal Society of Chemistry journal article supplement (doi:10.1039/b306778e), 2003-01-01
Supplement: b306778e.doc [file b306778e.doc]

## Supplementary Material

## Molecular Modeling Studies

In order to clarify the conformational behavior of the ligand some MD calculations have been performed on **L** and H**L+**. In the following the retrieved information are summarized.

The 3D-arrangment assumed by the macrocyclic framework has been investigated. The [2424] C corners conformation appears to be the most stable for the neutral as well as the mono-charged 12-membered ring of **L** and H**L+**, respectively. While a rectangular shape for the protonated [12]aneN4 ring is very common [1], giving that it allows a very short H-bond between the trans-dimethylated nitrogen atoms, usually a [3333] C corners arrangement features the neutral macrocycle [1]. In this respect it is noteworthy that geometry optimizations performed on the simplified models sketched in the following scheme indicate the same energetic trend, i.e. the [2424] C corners conformation is the preferred both for the neutral and the monoprotonated species. Thus the side arms do not appear to play any role in determining the cycle’s conformation. On the contrary the stereochemistry about the two sp2 nitrogen atoms could be the cause of the rectangular array of the neutral ring. As a direct consequence the introduction of the acidic hydrogen should not imply any dramatic rearrangement of the molecular shape.

[2424] C corners

[3333] C corners

[3333] N corners
